# Supplementary material for: Detection of opsonizing antibodies directed against a recently circulating Bordetella pertussis strain in paired plasma samples from symptomatic and recovered pertussis patients
Source: PubMed Central journal article supplement (PMC6089961; doi:10.1038/s41598-018-30558-8), 2018-08-13
Supplement: 41598_2018_30558_MOESM1_ESM.pdf [file 41598_2018_30558_MOESM1_ESM.pdf]

**Detection of opsonizing antibodies directed against a recently circulating *Bordetella pertussis* strain in paired plasma samples from symptomatic and recovered pertussis patients.**

Elise S. Hovingh<sup>1,2</sup>, Betsy Kuipers<sup>1</sup>, Axel A. Bonačić Marinović<sup>1</sup>, Hendrik Jan Hamstra<sup>1</sup>, Danielle Hijdra<sup>1</sup>, Lapo Mughini Gras<sup>1,3</sup>, Inonge van Twillert<sup>1</sup>, Ilse Jongerius<sup>1,2,\$</sup>, Cecile A.C.M van Els<sup>1\*</sup> and Elena Pinelli<sup>1\*,#</sup>

<sup>1</sup>Centre for Infectious Disease Control, National Institute for Public Health and the Environment (RIVM), Bilthoven, The Netherlands. <sup>2</sup>Department of Medical Microbiology, University Medical Centre Utrecht, Utrecht, The Netherlands. <sup>3</sup>Department of Infectious Diseases and Immunology, Utrecht University, Utrecht, The Netherlands.

\*These senior authors contributed equally to this manuscript.

\$ Currently based at Department of Immunopathology, Sanquin Research and Landsteiner Laboratory of the Academic Medical Centre, University of Amsterdam, Amsterdam, The Netherlands

**Supplementary Table 1:** Description of data presented in this study.

|                            | <b>Mean</b> | <b>Standard Deviation</b> | <b>Minimum</b> | <b>Maximum</b> |
|----------------------------|-------------|---------------------------|----------------|----------------|
| <b>All samples (n=100)</b> |             |                           |                |                |
| OPA                        | 1,24        | 0,56                      | 0,42           | 3,16           |
| Anti-Ptx                   | 116,22      | 185,47                    | 1,20           | 1257,45        |
| Anti-FHA                   | 201,89      | 205,49                    | 17,65          | 1214,05        |
| Anti-Prn                   | 91,50       | 184,54                    | 0,35           | 1264,05        |
| Anti-Fim2                  | 31,34       | 70,59                     | 0,25           | 368,70         |
| Anti-Fim3                  | 11,27       | 29,67                     | 0,25           | 270,90         |
| Anti-OMVs                  | 38,51       | 47,58                     | 1,65           | 250,20         |
| Anti-LOS                   | 70,40       | 106,21                    | 2,00           | 528,70         |
| Anti-Vag8                  | 47,71       | 117,73                    | 1,70           | 982,05         |
| Anti-BrkA                  | 89,64       | 167,70                    | 0,45           | 1121,20        |
| AI-Ptx                     | 0,24        | 0,12                      | 0,02           | 0,52           |
| AI-FHA                     | 0,29        | 0,23                      | 0,07           | 0,59           |
| AI-Prn                     | 0,50        | 0,23                      | 0,03           | 1,13           |
| AI-Fim2                    | 0,59        | 0,19                      | 0,02           | 1,03           |
| AI-Fim3                    | 0,63        | 0,16                      | 0,19           | 1,01           |
| AI-OMVs                    | 0,41        | 0,16                      | 0,11           | 0,82           |
| AI-LOS                     | 0,39        | 0,15                      | 0,05           | 0,91           |
| AI-Vag8                    | 0,26        | 0,25                      | 0,01           | 1,79           |
| AI-BrkA                    | 0,09        | 0,09                      | 0,01           | 0,49           |
| <b>Symptomatic (n=40)</b>  |             |                           |                |                |
| OPA                        | 1,59        | 0,57                      | 0,69           | 3,16           |
| Anti-Ptx                   | 245,185     | 23,9034                   | 31,15          | 1257,45        |
| Anti-FHA                   | 361,1975    | 236,8367                  | 52,8           | 1214,05        |
| Anti-Prn                   | 165,2662    | 255,435                   | 1,15           | 1264,35        |
| Anti-Fim2                  | 53,86       | 101,0237                  | 0,3            | 368,7          |
| Anti-Fim3                  | 17,0962     | 43,69909                  | 0,3            | 270,9          |
| Anti-OMVs                  | 68,585      | 61,1552                   | 9,35           | 250,2          |
| Anti-LOS                   | 131,7713    | 143,465                   | 3,95           | 528,7          |
| Anti-Vag8                  | 77,68625    | 174,0224                  | 1,8            | 982,05         |
| Anti-BrkA                  | 160,585     | 231,405                   | 0,45           | 1121,2         |
| AI-Ptx                     | 0,22633     | 0,1133                    | 0,0175         | -0,5106        |
| AI-FHA                     | 0,33549     | 0,1047                    | 0,1281         | 0,5884         |
| AI-Prn                     | 0,49643     | 0,2335                    | 0,0717         | 1,0164         |
| AI-Fim2                    | 0,54758     | 0,2212                    | 0,01557        | 0,9998         |
| AI-Fim3                    | 0,58314     | 0,1891                    | 0,1925         | 0,9669         |
| AI-OMVs                    | 0,3792      | 0,1394                    | 0,105612       | 0,6313         |
| AI-LOS                     | 0,32145     | 0,1277                    | 0,0471         | 0,6769         |
| AI-Vag8                    | 0,15128     | 0,1023                    | 0,0111         | 0,4097         |
| AI-BrkA                    | 0,0696      | 0,071                     | 0,0066         | 0,3417         |
| <b>Recovered (n=40)</b>    |             |                           |                |                |
| OPA                        | 1,18        | 0,40                      | 0,47           | 1,94           |
| Anti-Ptx                   | 38,3475     | 54,439                    | 4,1            | 334,45         |
| Anti-FHA                   | 121,75      | 71,23                     | 28,6           | 330            |
| Anti-Prn                   | 58,085      | 105,1909                  | 0,55           | 560,9          |
| Anti-Fim2                  | 17,0325     | 36,0705                   | 0,25           | 162,7          |
| Anti-Fim3                  | 5,14625     | 7,3895                    | 0,25           | 28,2           |

|                        |          |         |        |        |
|------------------------|----------|---------|--------|--------|
| Anti-OMVs              | 21,41375 | 19,6239 | 2,6    | 85,45  |
| Anti-LOS               | 32,24875 | 34,58   | 2,95   | 125,45 |
| Anti-Vag8              | 27,05625 | 34,307  | 1,7    | 161,3  |
| Anti-BrkA              | 53,645   | 92,057  | 0,5    | 425,1  |
| AI-Ptx                 | 0,25248  | 0,1294  | 0,0224 | 0,521  |
| AI-FHA                 | 0,31083  | 0,1074  | 0,1053 | 0,5757 |
| AI-Prn                 | 0,52677  | 0,237   | 0,0341 | 1,1317 |
| AI-Fim2                | 0,62404  | 0,2404  | 0,0482 | 1,0309 |
| AI-Fim3                | 0,640905 | 0,1936  | 0,2268 | 1,0144 |
| AI-OMVs                | 0,42651  | 0,166   | 0,1057 | 0,8152 |
| AI-LOS                 | 0,4429   | 0,1401  | 0,1773 | 0,7821 |
| AI-Vag8                | 0,28077  | 0,2123  | 0,0279 | 0,806  |
| AI-BrkA                | 0,951285 | 0,1015  | 0,0073 | 0,4896 |
| <b>Controls (n=20)</b> |          |         |        |        |
| OPA                    | 0,68     | 0,21    | 0,42   | 1,31   |
| Anti-Ptx               | 14,03    | 12,2024 | 1,2    | 42,45  |
| Anti-FHA               | 43,5725  | 33,6289 | 17,65  | 139,35 |
| Anti-Prn               | 10,795   | 11,9578 | 0,35   | 43,8   |
| Anti-Fim2              | 14,92    | 23,7119 | 0,45   | 93,95  |
| Anti-Fim3              | 11,86    | 20,1178 | 0,6    | 74,2   |
| Anti-OMVs              | 12,557   | 9,897   | 1,65   | 31,75  |
| Anti-LOS               | 23,957   | 28,6594 | 2      | 119,95 |
| Anti-Vag8              | 29,04    | 66,9428 | 2,85   | 287,65 |
| Anti-BrkA              | 19,7275  | 27,3995 | 0,95   | 99,85  |
| AI-Ptx                 | 0,2668   | 0,1295  | 0,0819 | 0,5248 |
| AI-FHA                 | 0,18     | 0,0828  | 0,0693 | 0,3312 |
| AI-Prn                 | 0,4736   | 0,2096  | 0,2086 | 0,9181 |
| AI-Fim2                | 0,5902   | 0,2088  | 0,1789 | 0,9712 |
| AI-Fim3                | 0,694    | 0,1774  | 0,2794 | 0,9156 |
| AI-OMVs                | 0,4471   | 0,1714  | 0,2173 | 0,8188 |
| AI-LOS                 | 0,4215   | 0,1829  | 0,1743 | 0,9126 |
| AI-Vag8                | 0,4294   | 0,4022  | 0,0418 | 1,7859 |
| AI-BrkA                | 0,1139   | 0,1057  | 0,0133 | 0,3726 |

**Supplementary Table 2:** Statistics presented in this study.

| <b>k</b> | <b>Group 1</b> | <b>Group 2</b> | <b>Outcome variable</b> | <b>p.value</b> | <b>transformed.p.value (FDR)</b> | <b>number of tests</b> | <b>no. false positives</b> |        |
|----------|----------------|----------------|-------------------------|----------------|----------------------------------|------------------------|----------------------------|--------|
| 1        | Symptomatic    | Recovered      | IgG PTX                 | 0.00000        | 0.00000                          | ****                   | 39                         | 0.000  |
| 2        | Symptomatic    | Control        | IgG FHA                 | 0.00000        | 0.00000                          | ****                   |                            | 0.000  |
| 3        | Symptomatic    | Recovered      | IgG FHA                 | 0.00000        | 0.00000                          | ****                   |                            | 0.000  |
| 4        | Symptomatic    | Recovered      | IgG OMV                 | 0.00000        | 0.00000                          | ****                   |                            | 0.000  |
| 5        | Symptomatic    | Recovered      | IgG LOS                 | 0.00000        | 0.00000                          | ****                   |                            | 0.000  |
| 6        | Symptomatic    | Recovered      | IgG PRN                 | 0.00000        | 0.00000                          | ****                   |                            | 0.000  |
| 7        | Symptomatic    | Recovered      | IgG FIM3                | 0.00000        | 0.00000                          | ****                   |                            | 0.000  |
| 8        | Symptomatic    | Control        | IgG PTX                 | 0.00000        | 0.00000                          | ****                   |                            | 0.000  |
| 9        | Symptomatic    | Recovered      | IgG FIM2                | 0.00000        | 0.00001                          | ****                   |                            | 0.000  |
| 10       | Symptomatic    | Recovered      | OPA                     | 0.00001        | 0.00004                          | ****                   |                            | 0.000  |
| 11       | Symptomatic    | Control        | IgG OMV                 | 0.00003        | 0.00010                          | ****                   |                            | 0.001  |
| 12       | Control        | Recovered      | IgG FHA                 | 0.00006        | 0.00020                          | ****                   |                            | 0.002  |
| 13       | Symptomatic    | Control        | OPA                     | 0.00010        | 0.00030                          | ****                   |                            | 0.004  |
| 14       | Control        | Recovered      | OPA                     | 0.00010        | 0.00028                          | ****                   |                            | 0.004  |
| 15       | Symptomatic    | Control        | IgG BRKA                | 0.00035        | 0.00090                          | ***                    |                            | 0.014  |
| 16       | Symptomatic    | Control        | IgG PRN                 | 0.00039        | 0.00096                          | ***                    |                            | 0.015  |
| 17       | Symptomatic    | Recovered      | AI VAG8                 | 0.00088        | 0.00203                          | ***                    |                            | 0.034  |
| 18       | Symptomatic    | Recovered      | IgG VAG8                | 0.00127        | 0.00274                          | **                     |                            | 0.049  |
| 19       | Symptomatic    | Recovered      | AI LOS                  | 0.00144        | 0.00296                          | **                     |                            | 0.056  |
| 20       | Symptomatic    | Recovered      | AI BRKA                 | 0.00163        | 0.00318                          | **                     |                            | 0.064  |
| 21       | Control        | Recovered      | IgG PTX                 | 0.00193        | 0.00359                          | **                     |                            | 0.075  |
| 22       | Control        | Recovered      | IgG PRN                 | 0.00257        | 0.00456                          | **                     |                            | 0.100  |
| 23       | Symptomatic    | Recovered      | AI FIM3                 | 0.00263        | 0.00445                          | **                     |                            | 0.102  |
| 24       | Symptomatic    | Recovered      | IgG BRKA                | 0.00279        | 0.00453                          | **                     |                            | 0.109  |
| 25       | Symptomatic    | Control        | IgG LOS                 | 0.00618        | 0.00963                          | **                     |                            | 0.241  |
| 26       | Symptomatic    | Control        | IgG VAG8                | 0.00642        | 0.00963                          | **                     |                            | 0.250  |
| 27       | Symptomatic    | Recovered      | AI OMV                  | 0.01126        | 0.01626                          | *                      |                            | 0.439  |
| 28       | Symptomatic    | Recovered      | AI FIM2                 | 0.01484        | 0.02067                          | *                      |                            | 0.579  |
| 29       | Symptomatic    | Recovered      | AI FHA                  | 0.02013        | 0.02707                          | *                      |                            | 0.785  |
| 30       | Control        | Recovered      | IgG OMV                 | 0.04673        | 0.06075                          |                        |                            | 1.822  |
| 31       | Symptomatic    | Recovered      | AI PTX                  | 0.07351        | 0.09248                          |                        |                            | 2.867  |
| 32       | Control        | Recovered      | IgG BRKA                | 0.08220        | 0.10018                          |                        |                            | 3.206  |
| 33       | Symptomatic    | Control        | IgG FIM2                | 0.10110        | 0.11948                          |                        |                            | 3.943  |
| 34       | Symptomatic    | Recovered      | AI PRN                  | 0.12920        | 0.14820                          |                        |                            | 5.039  |
| 35       | Symptomatic    | Control        | IgG FIM3                | 0.27900        | 0.31089                          |                        |                            | 10.881 |
| 36       | Control        | Recovered      | IgG FIM3                | 0.30820        | 0.33388                          |                        |                            | 12.020 |
| 37       | Control        | Recovered      | IgG VAG8                | 0.31690        | 0.33403                          |                        |                            | 12.359 |
| 38       | Control        | Recovered      | IgG LOS                 | 0.40950        | 0.42028                          |                        |                            | 15.971 |
| 39       | Control        | Recovered      | IgG FIM2                | 0.79090        | 0.79090                          |                        |                            | 30.845 |
